# Supplementary material for: Alterations in cardiac DNA methylation in human dilated cardiomyopathy
Source: PubMed Central journal article supplement (PMC3598081; doi:10.1002/emmm.201201553), 2013-01-22

## **Table of contents:**

**Supplemental Table 1: Primer sequences for MassARRAY assays.**

**Supplemental Table 2: Primer sequences for promoter luciferase assay.**

**Supplemental Figure 1: MassARRAY-based validation of differential methylation in ADORA2A.**

**Supplemental Figure 2: MassARRAY-based validation of genes.**

**Supplemental Figure 3: Protein conservation of LY75**

**Supplemental Figure 4: Regular molecular chamber definition in adora2a-morphants.**

**Supplemental Table 1: Primer sequences for MassARRAY assays**

| Gene     | Primer (forward)                  | Primer (reverse)               | Target Genomic Sequence                                                                                                                                                                                                                                                                                                                                                                                                                                                                                                                                                                                                                                                                                                                                                                           |
|----------|-----------------------------------|--------------------------------|---------------------------------------------------------------------------------------------------------------------------------------------------------------------------------------------------------------------------------------------------------------------------------------------------------------------------------------------------------------------------------------------------------------------------------------------------------------------------------------------------------------------------------------------------------------------------------------------------------------------------------------------------------------------------------------------------------------------------------------------------------------------------------------------------|
| ADORA2A  | TTTTTAGGTGGGTGTTG<br>GTAGTT       | AATCCCCTAATCCAATA<br>AAATTCC   | TCCCTTAGGTGGGTGCTGGTAGTTCTCTGGGAGAGTTGACGGGATGGAGCAGGCCA<br>GGGGGGCTGAGAAGTTGGCCTGGCCGAGAGAAGGTGGGTGGGACTGGGAGAGCCT<br>GGGCAGGGAGGGGCTTTCTGGGAGGGAGTGTATGGGGCTGGCCGAGATCCAG<br>GACCAGAGAGTAGTCCCAAGTCCACAGGAGCCCTGAGAGGCTGAGCATGGG<br>GGCCAACTGACAGACTTTAAACAAGTTTCTGGCTCCCCAGGAAAAAACAGAC<br>CACATCTGATCCTTGGCCCTGAGTCCAGAGTGGGAGGCACCGTGACAACAATGCGC<br>AGAGCAGGAATGCAGGGAGCCATGGATAGTGTGGGGTGGAGTGGAGTCCCTGGC<br>AGGGGCCAGCTAGGGCAGTACTATTCTGCAGAGCCTGGGAGAAGGGGCTGCCT<br>CCTTGGGAGGGGTTGTGTGGGAGTCTCAGCGGAATTCTATTGGACCAGGGGAA<br>CC                                                                                                                                                                                                                                                          |
| ATP2C1   | ATTGGATAAAGGTATAGT<br>TGTTAAAGAAG | AACAATCACAATCTCAAC<br>AAACAAC  | ACTGGACAAAGGTACAGCTGCTAAAAGAAGTGTCTGTTTCATTGGCTTCGACAGCTG<br>TACGACTGGTTTCTAATTGCTGTCCAGCCTCTCCCAAGTTCCATATACCACAAACG<br>AATGAAAAGATTAGCTCTCCCTGGAGCTCTCTGAGGCTGAACCTTGCTCTCTCATT<br>ACACATGGTAAGTAAAGCACACCCTTAAAGAATTTGGGAAGTCGCCCGCGATTAC<br>CGGCTCCCCCAAGAACCAAGCAGTCACTGCAGGGTTTTGCAAGTGAGAGTGCAG<br>ACTCGGAGGCTGCTCAGGTGCTCCAGTCCCTGGCAGGAGCATGGACACCTCGC<br>CCCTTCTCCGTGGCCCTCAACGTTGCCTGCTGAGATTGTGACTGCC                                                                                                                                                                                                                                                                                                                                                                                 |
| CCDC59   | TTTTTAGTGAAGTAGAG<br>TGGGAAG      | TTAAACAACCTCTTAC<br>ACAATCC    | CCCCTAGTGAAGCAGAGTGGGAAGCAGTGGGTGGTGGGGTAGGGCGGGCGGG<br>AAGGGAGGCGGAGGAGAAGGTCCCGCAGACGAAGCGAGCCCTGGTGGGAAGC<br>CAGCAGAACCCAGTGGCTGGCGGGGAGGCGGGCGCCCTGGTGGGAACCGGA<br>GGAGGGTGGGATTAGTTGAGGGGTGGGGTGGGATGTTCTTTGAAATCAGGATC<br>ACTCTTTCTTTGGGTGCTTGTGTATGTCACAATTTAAAGAAAGCAGGAACAGGGC<br>AGGGGAGTTCCTTATCTAGTAATTCATAATAATTGACGCTAGGGAACCTAGGGGA<br>GCAATGCTCTCAGAGTTTATAAATGCCAGCATGTGGTGGAAATTAAGTCAAGCT<br>TAATAAGATAATTTCAAGTGGTGGTAATGAAGTAGAAAAATAAACAGTGAATGTG<br>GTAGGGATTGTGAAGGAGGCTGCCTCAA                                                                                                                                                                                                                                                                                           |
| CLDN4    | GTTTATTATAGTTTTTT<br>TAGATGGTTTG  | CATCAAACTAATTTAT<br>CTCCTAATCA | GTTCCATCAGTGGCCCTCCAGATGGTCTGCGAGGTGACAATGTTGCTGCCGATGA<br>AGGCCGTACGCGCCACATGGGCAGCGCAGCACAGCATGACGGCCAGCCAGC<br>CCAGGACGGCCAGCGCATGCCATTACCTGTAGCCCATGGAGGCCATTGTTCA<br>GCGTCCACGGAGTTGAGGACCTGGAAGGCTGAGGGGATCCGGCTGGGGGCGC<br>GTAGGATCCAAGCGCTGGGACGACTTAACGTTGCGAGAGTGCACCTTTGACC<br>GTGAGTCAGGAGATAAAGCCAGTCTGATGC                                                                                                                                                                                                                                                                                                                                                                                                                                                                          |
| ERBB3    | GGAGATTTTTAGTAGAG<br>AATAGTTTTTTT | TACTACCAAAACCTAC<br>TAATCCC    | GGAGATTCTCCAGTAGAGAACAGGCCCTTAGGTTGCATATCAATAGGGAGCATGT<br>TTAAGGAATGTAGCCGGTAGTCTTTGCTAGGTGTGAGGGGTGAAATTTTTCTTTAT<br>CAAGGCTCAACTGTTTTGAAAGTCTTACAGCTTGAAGTTCTGGAGAAAACAATAGG<br>CTCTCCGGGAGATCCCGAATACCAGTTTAAAGGATTTGAAATGCAAGGCCCTCT<br>GGGACTCCACTGCCAGGATGGGCACCAGGCGGCGCCGCTGGATCCGTCGCCG<br>GACTAGCAGGGCTTTGGGCGAGCA                                                                                                                                                                                                                                                                                                                                                                                                                                                                     |
| FDX1     | TTTGTTTTATAGTGGGA<br>GAATTTATTT   | AACCTATAAAAAATTAA<br>CAAAAAAAC | TTTGTTTTACAGTGGGCAAGATTCACTTGTCTAATCTGACTCCAAGATGACACAAT<br>TTCCAGTTTTTTTTTAAACGGCTAGGGGATGGGGGTATGCGGAACAGAACACAGT<br>GGTCTAGCTAACCGATTTCGGCTAGACGCTCCAGCTATCTTCAAAATATTTTTGTTTCT<br>GCACGGCACTTACAGCCGCTAAAAAAGCATCCAGCTTACAACGGAACTGGAGGGT<br>TGTAAGGCCCCCTGCGCTGGCCCGCCCATGGACCGGGCGCGTGGGCGT<br>GAGAGCGGGGCGGGCCGCGCTCTGCTTGCCTAATGTTCTTTATAGGTC<br>GACTCTAAATCTAGTGAAGGGTGAATGGGAGGCTAGAACAGCCCGCCCTCCCT<br>GCAGGAAGCCCCATTGGGTTGGGCTGGGAAAAGGACAGACTGGCTGAGGG<br>GGGAAGGGCCTGGAGCCGGGGTGGTGGGGCAGCGGGGATGTCGGGGTGGC<br>GGGGTGGGGGAAATTTCTAAAATAAGGAAACCGTAGCCCGGGGGTCCCGGTT<br>TCCATATAACAGGCATCTCTGAAGTGCCTGTGCTGTGCCTGGCGTGTGCTAGGGA<br>GACACTTCCATTCATTCTCCACTCCAGTAACTGAGCATCTATTAGGCTCCAGCC<br>CCTATGCTGGGTTCTGAGGATGCAGCGACGAGAATAGAAGACAAGAAATGTTCC<br>TTCTCTGGAGCTTACCTTCTGCTTTGGA |
| FLJ20701 | GATTTTAAATTTAGTGA<br>GGGGTGAA     | TCCAAAACAAAAATAAA<br>CTCCAAA   | GACTCTAAATCTAGTGAAGGGTGAATGGGAGGCTAGAACAGCCCGCCCTCCCT<br>GCAGGAAGCCCCATTGGGTTGGGCTGGGAAAAGGACAGACTGGCTGAGGG<br>GGGAAGGGCCTGGAGCCGGGGTGGTGGGGCAGCGGGGATGTCGGGGTGGC<br>GGGGTGGGGGAAATTTCTAAAATAAGGAAACCGTAGCCCGGGGGTCCCGGTT<br>TCCATATAACAGGCATCTCTGAAGTGCCTGTGCTGTGCCTGGCGTGTGCTAGGGA<br>GACACTTCCATTCATTCTCCACTCCAGTAACTGAGCATCTATTAGGCTCCAGCC<br>CCTATGCTGGGTTCTGAGGATGCAGCGACGAGAATAGAAGACAAGAAATGTTCC<br>TTCTCTGGAGCTTACCTTCTGCTTTGGA                                                                                                                                                                                                                                                                                                                                                          |
| GF1      | TTTATTTAATGAGTAAA<br>GGGTGAGGT    | CCTAAAATCATACCCAA<br>CACTAAAT  | TCCACTCCAATGAGCAAAGGGTGTAGGCTTTGAGTATACACAGCAGGCCACACACT<br>ATGGGTCATGGCATACAGTCTAGCGTTGGAGGTTGCTGCATTTGTCATGTATCTAT<br>GAGTTAGGTTTTAAGTTTTTCCCCCTGTTCTATTAATAATAATTAAGTAAATTAAC<br>CCCACTATTCATTTACTCAGTCCACAGCCTTTTGTAAAGAGCCCGCTAGGACATA<br>AAGATGAAGATCCAGTGCCTACCCTCATGAAACATAGAATCCGAGCCGAGGAGCT<br>TACTTTGCAATAGTCATCCAAGTGGTCTTTATGGCGCTTACTGCTCCCGCCAAC<br>ACCCAGTGCTGGGTATGACCTCAGG                                                                                                                                                                                                                                                                                                                                                                                                     |
| GSTM5    | GGAGGGGGTTTATTGAT<br>TTTAGTTT     | TAACCTTCTACACCAA<br>ACCAACC    | GGAGGGGCTTATTGATTCAGCCCGGGCGCTGCTCGGGGGCTACAGAATGG<br>CGTGTTCGGGGTTGTGGCGGGCCGAGGGGCGGGGTCGCAGCAAGGCCCGCCT<br>GTCCCTCCTGGGCTCTCAAAGTCTGAGCCCGCTCCGCTGATGCCTGTCTGCAG<br>AATCCGACCAACCAAGCACCATGCCATGACTCTGGGTAAGTGGACATCCGTTG<br>GGTAAGCGAGGCTCTGTTGGTGGGACAGGGGGCGGAGGCGGGATGTGTG<br>GAGTAGTGCAGGACTGGCTCTAGGGACCGTTCCTTTCAGGGCTGCCCGCTCA<br>GAAGGGCCTGTGCATGACGCTGTGTGTGTTTGGGGTGGGGGCGGGTAGAGGA<br>GGCAGCGGTACGTGAGTATAGACTAGGGCTGGCCTGGTGCAGAAAGTAC                                                                                                                                                                                                                                                                                                                                            |
| HOXB13   | GGTAGTTTTGGTTTTGG<br>GTTTT        | ACTATCCCTAAATCTAT<br>CTCTCCC   | GGCAGCCCTGGCTTTGGGCTGGGTAAGTACTAGCACCCAGTTCACTCCCGGTACCC<br>TTCTGTCCAGATGCTCTGGAATGAGTGTCTCCGGGCCCAAGGAGGTGCCCTG<br>GACGCCCTTACCAGGGACTCGCTACTGCCAGAATGCTCTGGAGGCCCTGATTTG<br>GGTGAGGCTGAGGGAAGAGCGGGAGACACGAACGTAGACGTAGAAGACATCCGTTG<br>GATCTGGATGGAACCCAGGACTCCACTTCCGACCTGAAGGGGAAATGGAGCC<br>TCTAGAGTGGCCTGTGGAAGGGTCTGGATTTCCCTTTAAGTAAAGACATACGGAGG<br>GACGGAGCCACAGGACTTGAAGGAGGGACGGGGAGAGGAGAGATGAGACT<br>AGGGACAGC                                                                                                                                                                                                                                                                                                                                                                     |
| ID4      | AATGGAGTGTTTTTTTA<br>TTGGTT       | AATATCCTAATCACTCC<br>TTC       | AATGGAGTGGCCTTCCATTGGCCCGAGCGTCACTCCCGAGGTGGCACTGCCCG<br>CCTGATGGCTGGCCACTCCAGACCCCGCCCACTCTCCACTCGGATAGCCCG<br>ACTCCCGCCCGCCAGCAGCCCGGAGCCCGCCCTCGCTCTCCCTCCGGC<br>CCCGCCCGCCCGCCAGCGGGCTCCGCTCGGCTCGCGCTGCGACCCGGCCCGC<br>CGCTGTCCCGCCCGGGGCGCACGGCTATAA                                                                                                                                                                                                                                                                                                                                                                                                                                                                                                                                        |

|          |                                  |                                |                                                                                                                                                                                                                                                                                                                                                                                                                                      |
|----------|----------------------------------|--------------------------------|--------------------------------------------------------------------------------------------------------------------------------------------------------------------------------------------------------------------------------------------------------------------------------------------------------------------------------------------------------------------------------------------------------------------------------------|
| LY75     | GTATTTTGTAGGTTT<br>TTGGGG        | AAAAATCATAAATCCCTT<br>TCCAATC  | GCACCTCTGTCTAGGCCTCTGGGGGCCCCCGGCCCGCCCGCCCGCCCTCGG<br>CCAATCAGACGTGCGTCTCTCGGCCCGGGGGGAGCGGGCCAGGTGTGGAA<br>ATGAACAGGGCTGGGGCCTAGATACCTGCGTGGGTAGGACCCCGGAGGAAG<br>GTACGTGCGGATCGGTGGGAGAGCCAGGCACAGAGGCTCCTGCAGTGGAGG<br>GTTCCGGTCCCGCTTTCATCAGCCAAGCTGGGAGATCGGCCCTACTGGGA<br>CTTGGCACCGCCCTGGTGGTGGTTCTATCAGTTTAGAACCCTTGGCCTCTGCCTG<br>GCGCACTGTGTCAGGACGACTTCTCCATTCCAGCCTGGACTGGAAGGGACCC<br>ATGATCTCT                        |
| NAT1     | TTTTTTAGGAAGTAAAA<br>GGAATGTT    | TCAAACCTCCATATCTC<br>ACTATCCC  | CCTCCTTAGGAAGTAAAGGAATGTAGTGTGGATTTTGCATTGGAGGCTAGTCT<br>GACCCCACTGCAGTGAACACAGCACTGGGCAGAGCCTCCAAGGCCCTTATTCTA<br>GGCTGGAGGCCACAGAGGAGCATTTAGACCCCGCCCGGGTCAAGGAAATC<br>TGCTACCTCAGCAGGAGGAATCCAAGTCCAGTCCACTTCAACAACCACTAACTAAA<br>GTGGCCTTCCGCGAGCCCTAAACAAGATTGCACTCAGGTAGATTATTTGGAAG<br>ATGATTTAAGGACGTACCAGTGCAGGAGTTGTCGCGGGACAGTGAGACCAGGGCA<br>GTTTGAC                                                                     |
| PPARGC1A | GATTTTTTAAAGTTTTT<br>GTTTGG      | ACAAATACCTTCAATTCA<br>CTCTCAA  | GATTCCTTAAAGCTCCTGCTGGACTACTTTCTGGCTCCTCTTTGCCAAGC<br>CCATCCCCCTTACAGGAATAATAGCATCTGAGGGAAGCGTCAGTTGTGGCTGCAG<br>CGCCGAGCCCTGCCAGCTCAGTGTACTCCATACAGACTCAGAGTCCG<br>GTTGCACATGTCCACGCCATCCAGCTCCTGAATGACGCCAGTCAAGCTTTTTCAAC<br>TCCAATCCAGTGACACAGACACTCATGACGCAACCCAGCCCTTACTGA<br>GAGTGAACGAAAGCCCTGT                                                                                                                              |
| SLC9A6   | GTTTTGATTGGGTAGG<br>GGT          | AACTACCATAAATCATA<br>ACCAAACC  | GTCTTTGACTGGGCAGGGGCTTCGGACGGCGCGGGAGAGGCTAGAGCCATG<br>GACGAGGAGATCGTGTCCGAGAAGCCGAGGAGGCCACCCGAGGACAGC<br>GCCAACCTGCTCATCTTATCTGCTCACCCTCACCACTTCCACAATCTGGCTC<br>TTAAGCACCCCGGGCCCGCTTCTGACGAAACCCGCTGGCTATGATTTATGG<br>CAAGTTC                                                                                                                                                                                                    |
| SULF2    | GAGTTTTGTAAAGTAGA<br>TAAAGAAAAAT | TAACACACAAACAAAAA<br>ACATC     | GAGTCTGTGAAAGCAGATAAAAGAAAACATTTATTAACGTGTCATTACGAGGGGAG<br>CGCCCGCCGGGGCTGTGCGACTCCCGCGGAACATTTGGCTCCCTCCAGCTCCG<br>AGAGAGGAGAAGAAGAAGCGAAAAAGGAGGAGTTCAGTCTTTCCAGCAAGT<br>GGACCTGATCGATGGCCCTCCTGAATTTATCACGATTTGATTTATTAGCGATGCC<br>CCCTGGTTTGTGTGTATC                                                                                                                                                                            |
| TDG      | TGGTTGGTAGTATTTAGA<br>TAGTGGTTG  | ATATACACAAACCCCAA<br>AAACAA    | TGGCTGGCAGTACCAGACAGTGGCTGGACTAAGCTCCTCCTCCAGGCTTCTACC<br>GTCCCCACGGACCCCTTTCTGTGCTGCACTTCCGCTCCTCGGAGCCAAATCCC<br>ACGCGTACTGGCCGTACGTGATGTAGGACAGCCCAATCACGCTCACCCCTTCTC<br>GTTGGCGCCAGCTCCGCGCTTGGCCTTTCGGGAAGGGTGGAGACCAGAAAGA<br>CGGGACTAGGAGCGCTCTGCCGACGTACGCTTTTGTCTCCAGTATTTTCGGGGGG<br>TGGTGACCGCTGGGGATAGGGTGTCTGCTTGGGGTGTGTATAT                                                                                          |
| TFF1     | AGGTTGTAGAGTTGGTT<br>GTGGTT      | AACTTTCTAAATCTCAA<br>TCCCTCAA  | AGGCTGCCAGAGTGGCTGTGGCCCCACAGAGCAGGAAGAAGCACGCCCTTACCTG<br>TCTGGGCTCGGCGAGGGTGCAGAGGGCCAGCATGGACACCAGGACAGGGCGC<br>AGATCACCTTGTCTCCATGGTGGCCATTGCCTCCTCTGTCTCAAAGCCAGCC<br>CGAGTCAAGGATGAGAGGCCCGCCGAGCCCGGATTTTATAGGGCAGGCTCTGTT<br>TGCTTAAAGAGCGTTAGATAACATTTGCTAAGGAGCCCGGGGATCCTCTGAGAC<br>AATAATCTCACTGATTTTTATCAAAGGTGTTCTAGACATGGTCAAGCTACATGGA<br>AGGATTTGCTGATAGACAGAGACGACATGTGGTGGAGTCTCTGGCTGAGGGATC<br>TGAGATTCAGAAAGTC |
| TKT      | GGGAAGGTTATTATTATT<br>GTTGTTTT   | AAATCCCAAAATCTACA<br>CCCA      | GGGAAGGCCACCATTACTGCTGTTCTACAGAACCGGCCCTCTTAAACCTCTCCAC<br>CACCTGGCTGTGTGGCGCCCGGGAGTGTCCCCCTTCCAGATGGGAAACGG<br>AGGCTCCGAGTTAGTACAGTACCAAGTTACACACAGGGAGATCTGATTTGAGCC<br>CCAGCAGTCCGACTCTAGAGACCCTGTTTTAATTCTCTTGCAGGAGACTCGGGG<br>GCCCGGCTTCTCCCACTCAGACTACGCTCCCTACCCTGTCTCTGCCACCC<br>CTGGGTTGGTCCGAGTTTGGAGCAGGGGGCTGCTGAGACGCCAGGACGGCGG<br>GGCTGATTGGGGAAAGGGGAGGAGGGCGGTGGCACGTGGGTGAGAACCCCT<br>GGGATCC                    |
| XRCC5    | GTTTTTGTAGGTTTGA<br>AAGGGG       | AAAAAAATCTAACTCCA<br>AAACTCTAA | GTTTCTGCTAGGCCTGAAAGGGGGCGGGAACCGTGCCCGGAACTCTGAGCAT<br>GCGCAGATCCCGCCGAGCTTGGCAGATCCCGCCGAGCTCGCAGATTTCCGG<br>CCGAGCATGCGCAGATTCTCTCCGAGCATGCGCAGATTCCCGCCGAGCATGCGCA<br>GATTCGGCCGAGCATGCGCAGATTCTCTCCATTCCGCGTGTGCGGAGCGTGTG<br>GTGTTTGGCCGCTGAAACGCTAGTACGACAGATTTACTTAAAGATTCACTTAATC<br>ACTTAAAGATTCAGTCCCTTTTCTCTATTGAGAATAACACCTAAGGCATTTGTGT<br>CAGAGCTCTGGAGTTAGATTTCTTT                                                   |

**Supplemental Table 2: Primer sequences for promoter luciferase assay**

| Gene | Primer (forward)         | Primer (reverse)           | Target Genomic Sequence                                                                                                                                                                                                                                                                                                                                                                                                                                                                                                                                                                                                                                                                                                                                                                                                                                                                                                                                                                                                                                                                                                                                                                                                                                                                                                                                                                                                                                                                                                                                                                                                                                                                                                                                    |
|------|--------------------------|----------------------------|------------------------------------------------------------------------------------------------------------------------------------------------------------------------------------------------------------------------------------------------------------------------------------------------------------------------------------------------------------------------------------------------------------------------------------------------------------------------------------------------------------------------------------------------------------------------------------------------------------------------------------------------------------------------------------------------------------------------------------------------------------------------------------------------------------------------------------------------------------------------------------------------------------------------------------------------------------------------------------------------------------------------------------------------------------------------------------------------------------------------------------------------------------------------------------------------------------------------------------------------------------------------------------------------------------------------------------------------------------------------------------------------------------------------------------------------------------------------------------------------------------------------------------------------------------------------------------------------------------------------------------------------------------------------------------------------------------------------------------------------------------|
| LY75 | TGGCACTACCCTGAACA<br>TCA | CATGAAATTTCTGGTTCT<br>GCAT | TGGCACTACCCTGAACATCAATGAAGGCTGTCTGTTTCTGGTCTGCTTCCGCAGTG<br>AGAGGCAGCAGGTCCCCAAGCAGGCGACCTGCCCTTACCCTGAGGCTGTCAGCC<br>TTGGGGGAGCGGGTCAATTTGGAGCTGATAAACCAATGAGAAGAAAGTTTGTTC<br>TCTAGGCGGTGGGTGAGGGCATCATAGCTGACTCTTGGTCTTGGTCACTTTCGGAG<br>GAGATGGTTTATTAACCTGACTTCCTTCTGATGCGCACCGTAGGCCAGTGAAT<br>CCGGGAATCGTGGGAATCCTTGGCGCTGTGGGTGGAGGCTCCTCTTGGCCCTGT<br>GGCCAAGGTGACCAAGGGCCGAAGGAAAAGCGAGAACGGGAGGGACGGGACGCA<br>AGAGGGCAGATGGGAACCCATACTCCAGCAACATTATATAAGAGAGGGCAGCAT<br>GGAGCAGCGCACCCGGCCAAAAAGCCTCCGTGCGCCTACTCTACGGTGACCCGC<br>GTCCCTCTGCACCAAGGGCCCTGTCTCCACATCCACCGGCCCTCCTCCG<br>GGCCCCGAGGGCACTGGGGCGCTTCTCTGCCAGACCTCCCTTGCAGTCACTC<br>TTCCGGCTCCAGAGCCCCCGCCCCAACAGCAAAGCAGCCGTGACCTGCCCCAG<br>GGCGCAGCCCTGCCCAAGGCTGGAAGGCAGCAGAGCTGTGGCGTCGAGGCACC<br>CAGCGGACTGCGGGCTGGCGTCCCGCGGTTACCTGCGGGCCAGAGGGCTCC<br>GCGAGATCGAAGAACCAGAAGAGCAGCATGAGGAGCCCCGGCGGGCGGAGGG<br>GTCGCCACGCTGCTCATCTGAGCTGGCGCAAGCCTTCCGGCCGGTCTCCG<br>GGCGCACGGCTCCCGCCCGCTGCTGAGCGCGGCTGCCCGCCCGCACCT<br>CTGTCTAGGCCTCTGGGGCGCCCCGGCCCCCGCCCGCCCTCGGCCAATC<br>AGACGTGCGTCTCCTCGGCCCGGGCGGAGCGGGCCAGGTGTGGGAAATGAAC<br>AGGCTGGGCGCTAGATACCTGCGTGGGTAGGACCCGCGAGGAAGGTACGT<br>GCGGATCGGTGGGAGGCCAGGCACCAGAGGCTCCTGCACTGGAGGGTTCGG<br>TCCCCGCTTTCATCAGCCAAGCTGGGGAGATGCGGCCCTTACTGGGACTTGGCA<br>CCGCCCTGGTGGGTGGTTCTATCAGTTTGAACCTTGGCCTTGCCTGGCGCACT<br>GTGGTCAGGGACGACTTCTCCATTCCAGCCTGGACTGGAAGGGACCCATGATCTC<br>TTCTACCCGGAGGAGGAAGTGAGCACCTGCCCTGTGGGTGGCTGCGGCCAAGCC<br>TAAGAATTCAGTCGTCTTGGCAACGCTTGGGTATTTGACAGTGCAAAACAAGGT<br>GGAATAATGGTACACTGCAGTTCTACCCATAGTTGTTAAAGAATTAAGCAAGAATT<br>ACTAGAATGACCAAACGACACTTCCAAGGATGACTTATGCTTTATAAAAAGTTGACCT<br>TTGCGAGTAAGCTCTTTCCTTAATAATTTAATGATAATAATAATTAGCTGGTAGAAAT<br>GTAGAAGTCTGCATGCAGAACCAGAAATTCATG |

**Supplemental Figure 1: MassARRAY-based validation of differential methylation in *ADORA2A*.** Graph representing individual CpG methylation in *ADORA2A* measured by MassARRAY in DCM patients and controls.

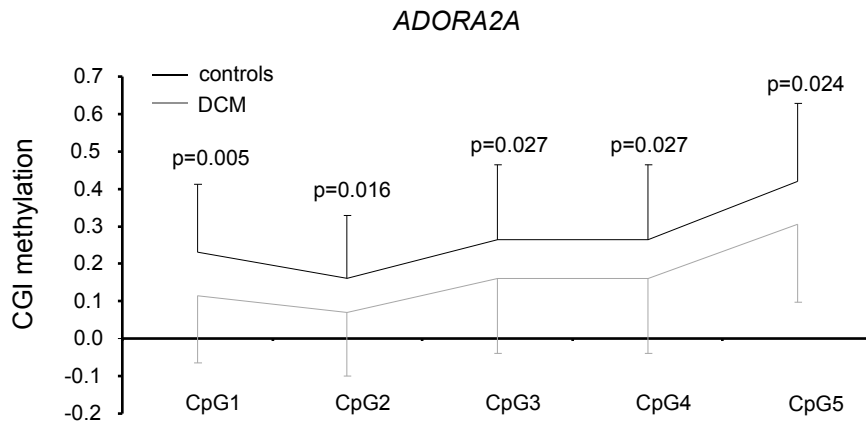

**Supplemental Figure 2: MassARRAY-based validation of genes.** Graphs representing the mean CGI methylation of targets included in the replication stage. DCM patients show a statistically not significant reduction in methylation level in *CLDN4*, *FDX1*, *HOXB13*, *ID4*, *NAT1*, *PPARGC1A*, *SULF2*, *TFF1*, *TKT* and a statistically not significant increase of methylation in *ATP2C*, *CCDC59*, *GFI1*, *GSTM5m*, *SLC9A6*, and *TDG*.

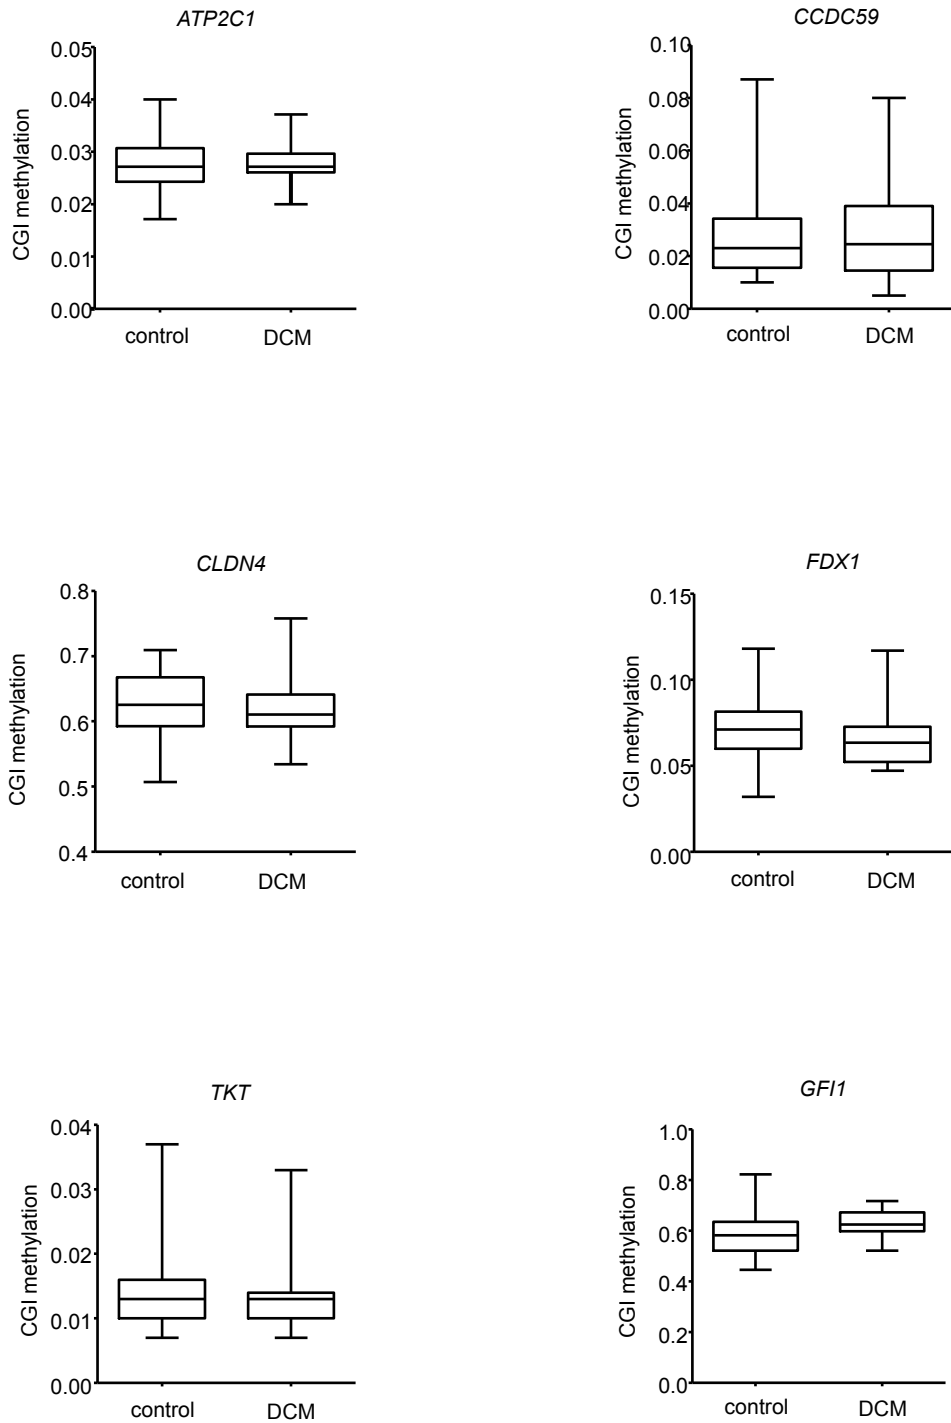

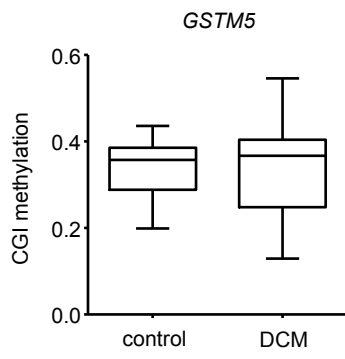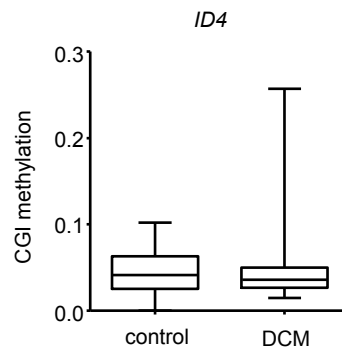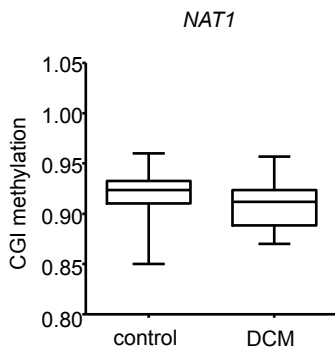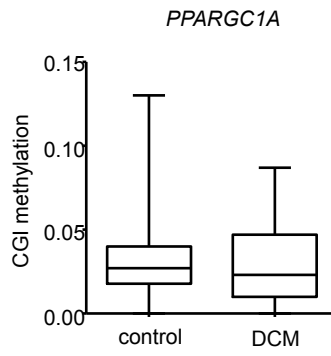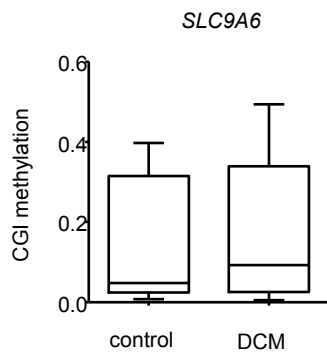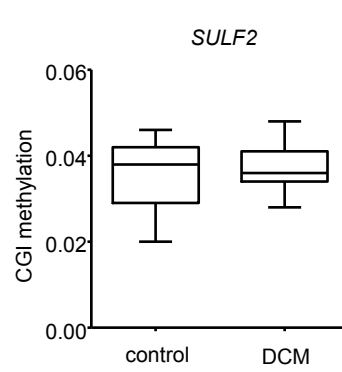

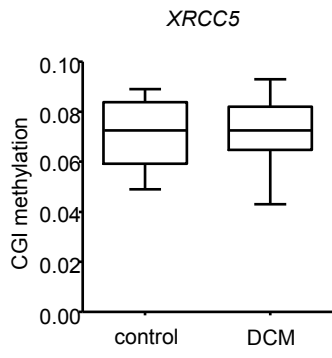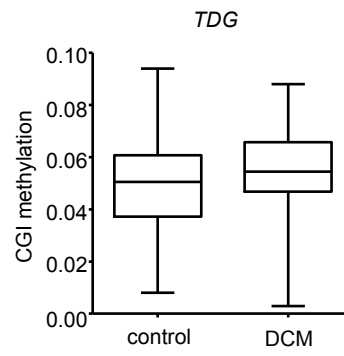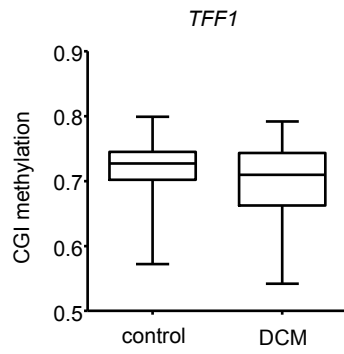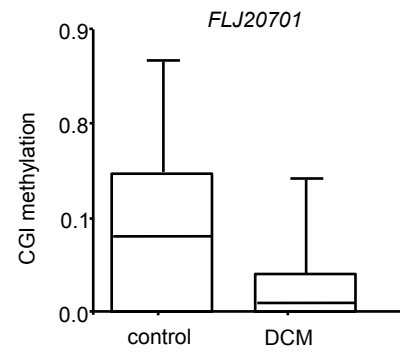



**Supplemental Figure 3: Protein conservation of LY75.** Amino acid sequence alignments of human (h), mouse (m) and zebrafish (z) LY75 demonstrating its cross-species homology. Black boxes indicate amino acid identity, gray boxes indicate amino acids with similar chemical properties.

```

hly75  MRTCGRFERRFAGLLILFWFELAEPSRANDEFTIVHNTCKCLFELVGVAVADCEDEEDKLLMKK
mly75  MRTCGRFERRFAGLLILFWFELAEPSRANDEFTIVHNTCKCLFELVGVAVADCEDEENNLWKKK
zly75  --MYGSHQIFSSFLISGGHIGSCASAGNSCLLTKRKLSTCKKLVQNGALKLGNCSSVPAFLWKKK

hly75  VSOHRLFHLESOKCLGLDITRAVDNLRMFSCDSVMLWVKCEHHSLYCAARVRLALDKGCHTALISNNSD
mly75  VSOHRLFHLESOKCLGLDITRAVDNLRMFSCDSVMLWVKCEHHSLYTAAQYRLALDKGCHTALISNNSD
zly75  GSAHRLFHLESMSGLGLEVR--AKTWTIFSCDSTELRWKCYEDVTVFVYEMHLSMGAQESVITAKRDQD

hly75  VWKKGSSBEELGQFVHEIYTRDQNSYGRCEFFPELICTWHHDCIDEDHSGFWCATTILNVEYDFKWC
mly75  VWKKGSSBEELGQFVHEIYTRDQNSYGRCEFFPELICTWHHDCIDEDHSGFWCATTILNVEYDFKWC
zly75  WKKSEGSNLECGQRTARKKHLSCGNSKCAICEFFPELKTQTHHSCGFFTEENLEKCSLRAVYCEQKQG

hly75  ICLXPEACEENWEKNECFSSCYFNNICTALSWKEAYVSCONQAGDILLSASAELAVIKRKEGLAKIFW
mly75  ICLXPEACEENWEKNECFSSCYFNNICTALSWKEAYVSCONQAGDILLSASAELAVITGKEDIARLIVW
zly75  NCLLYVVEGSSSLWEKRFVTKCYCVVTAIVVWWEARDAKRSQCDLLSSEPODIOCFKREKRDPSKLVW

hly75  IGLNQLYSARGWEWSDHPTNPLNWFDRSAPHTGGSSCARMESGLWQSFSCSAQLPYVCRKPLNNT
mly75  IGLNQLYSARGWEWSDHPTNPLNWFDRSAPHTGGSSCARMESGLWQSFSCSAQLPYVCRKPLNNT
zly75  IGLNQLYSARGWEWSDHPTNPLNWFDRSAPHTGGSSCARMESGLWQSFSCSAQLPYVCRKPLNNT

hly75  EPLDVMVYTDHCDACNLNNGFCYLLVNESN--SWDAABKCKAFKASDLISHSGLADVEVVVVKLHNE
mly75  EPLDVMVYTDHCDACNLNNGFCYLLANESS--SWDAABKCKAFKADLISHSGLADVEVVVVKLHNG
zly75  TSSVVRDVKHNSCGWIGWKCICYPHSABSKMSQHEALDLCMKDDKRLASHSIDLEMLHNEH--E

hly75  DLRKEVWIGLKNINIFLQWSDGTEVILTYWDENEENVFNKTPNCVSYLGLGQWVKVQSCERKLYVVC
mly75  DLRKEVWIGLKNINIFLQWSDGTEVILTYWDENEENVFNKTPNCVSYLGLGQWVKVQSCERKLYVVC
zly75  DLRKEVWIGLWNGGSSVFWVWIKAPVFWYVARACVPLLENLNCVYFSGEHTVWVSDCKPRKAVV

hly75  KRKGEKNDASDRKCFPDEGWKRHGETCYKYIEHVEPFGTNCNLTITSRFEQELANLMMKVDKSLRKY
mly75  KRKGEKNDASDRKCFPDEGWKRHGETCYKYIEHVEPFGTNCNLTITSRFEQELANLMMKVDKSLRKY
zly75  MNSQNLNLSAAEFCPPDGNMKRHGCACTWDTNIEFKNSCHLNNRFEQELNLSLKEHISEVLY

hly75  FWTGLRDVDSGEYNWALVGRRAVTFSNWNFLPEASGGCVAMSTGKSLGWKVEKCRSFKALSTICKK
mly75  FWTGLRDVDSGEYNWALVGRRAVTFSNWNFLPEASGGCVAMSTGKSLGWKVEKCRSFKALSTICKK
zly75  FWTGLRDSKSGSGEYVWFODETADCVTWNKRLPEASGGCVVMSGFNGLGWVKNCRSFKAGNICKK

hly75  VSG---LQFEEERKRFDDPCFEGVQSFPSLSCYKVFHADRIVKRNWEAERFQCALGAHLSFSSVU
mly75  VSG---LQFEEERKRFDDPCFEGVQSFPSLSCYKVFHADRIVKRNWEAERFQCALGAHLSFSSVU
zly75  FIKSKVQPIEPFVVENASCAFQWVSRDLNYCYKVFHBEELFKRSWEAERREGALCHLPSFEPVYK

hly75  EIKKFLHLEDOFSGQRLWIGLNKRSFDLQGSWOWSDRTFVSNIMENEFQODDTRDCAAQVBEER
mly75  EIKKFLHLEDOFSGQRLWIGLNKRSFDLQGSWOWSDRTFVSNIMENEFQODDTRDCAAQVBEER
zly75  DNEALHLILNSVSNRFRFWGLNRRNNTNNMWSDGRFVSMVIFEEKEDLYNRDCEAFTMMPT

hly75  WRRQWHLVYDSE--LILRPFACAKLEWVCOIPKGRTPKTPDWYNPDRASIHGFFLITGSEYWFVAL
mly75  WRRQWHLVYDSE--LILRPFACAKLEWVCOIPKGRTPKTPDWYNPDRASIHGFFLITGSEYWFVAL
zly75  WFLFLFLTRASPRFFPSTHSDAKLEWVCOIFSGEKKFVWNEP--GHTSFAHLEKSEWENF

hly75  HLNVEEAVLYCASNHSFLATITSEVGLKAIKKNLANISG--EQKWWVHISEMFIIDHLSR--YFHFH
mly75  HLNVEEAVLYCASNHSFLATITSEVGLKAIKKNLANISG--EQKWWVHISEMFIIDHLSR--YFHFH
zly75  HLNVEEAVLYCASNHSFLAIPDLKALHLEQCESEHSGPHFVWWDARYPGPHVEMESH--MRYV

hly75  FTFGEBCDYSAKTWLIDLKPTDCSKLFFICEKYNVSSLEKYSPE--AAKVQCSQWIFPONKCFKR
mly75  FTFGEBCDYSAKTWLIDLKPTDCSKLFFICEKYNVSSLEKYSPE--AAKVQCSQWIFPONKCFKR
zly75  ESSRGRGFPSPVVE--LDFYSRTGKSGFVGCETVWVSSLEKGFHDFHFVGTGCGGTYHAKKQIQI

hly75  IKPVSFI--FSQASITCHSYGGLTLPVLSQEQDFITSLLEMEAT--LWIGLRWTAYEINWTDNREL
mly75  IKPVSFI--FSQASITCHSYGGLTLPVLSQEQDFITSLLEMEAT--LWIGLRWTAYEINWTDNREL
zly75  ISESYFONKKEANFQQLKCEIITISIQEQDFITSLLEKFPNPRKWIGLKRRPE--TQWVDSPE

hly75  TVSNFHPLLVGRRLTEENFFEESNRHCALILNLOKSEBTGTWNFTSCSERHESLQCKYSEVKSQTL
mly75  TVSNFHPLLVGRRLTEENFFEESNRHCALILNLOKSEBTGTWNFTSCSERHESLQCKYSEVKSQTL
zly75  WLFNFKLHLEQFFRSFNFNPEQLLEICAYINDRHSVMTGTDYFSCTEFCQNSLCCVYAKLEBEFKP

hly75  QNREHVKVLANLYKIKLITLWHSKKECKRNNQVSTIDPYQOAFVQALNNSIHWIGLESODE
mly75  QNREHVKVLANLYKIKLITLWHSKKECKRNNQVSTIDPYQOAFVQALNNSIHWIGLESODE
zly75  ENN--FTVQGHLEKIQODNLWADALQCRSNPLASVFNAYQVLEHVEVSEKFLWIGLFSDD

hly75  ELNFGWSDGKRLHFSRWABENQQLDCCVLDTDGFWKTVDCNDNPGAICYYSNETEKEVEVDSVKCE
mly75  ELNFGWSDGKRLHFSRWABENQQLDCCVLDTDGFWKTVDCNDNPGAICYYSNETEKEVEVDSVKCE
zly75  GEHLEKLNNSHSEENRWT--SETEGSCVFLDTDGFWRATDCSELSGAICHIE--SIKRTLEDKPCHHK

hly75  SEVLTNPWIPFONCYNFTLNKRMATQDEVHRCQKLNKCHLISIRGERENNFVOLLIFYNYMAS
mly75  SEVLTNPWIPFONCYNFTLNKRMATQDEVHRCQKLNKCHLISIRGERENNFVOLLIFYNYMAS
zly75  S--LQGSWHRKKNVTLNMSRWNGDIS--KIKSTLDRHLELIRDEAENNFILQVLRKRLAM

hly75  WMLGITYR--NRLMWFDKTFLSYTHWRAC--RPTKNEKFLAGLSTDGFDWIDCFKVEEENYFHOHSI
mly75  WMLGITYR--NRLMWFDKTFLSYTHWRAC--RPTKNEKFLAGLSTDGFDWIDCFKVEEENYFHOHSI
zly75  FVWLGMSNTKTDQRLWIDCYIQPSNMYGCRBN--N--S--IAGLNLEWFTTIRKHLYV--FICQSI

hly75  IACKIEMVDYREENITLPOFNPYDGCYISVIOKRVTYWYBALNCSQSGGHLASVHNQNGFLLEDIVKR
mly75  IACKIEMVDYREENITLPOFNPYDGCYISVIOKRVTYWYBALNCSQSGGHLASVHNQNGFLLEDIVKR
zly75  WCKLENLKDEMLKGVVDINTPCLISRRKAKLNVWQALSGSNQGLHASTDKTINENALHAKR

hly75  DGFPLWVGLSSHDSSESSFEWSDGTFDYF---KQOTSPCCVLDPKCKWHEKCNVVDGAICYK
mly75  DGFPLWVGLSSHDSSESSFEWSDGTFDYF---KQOTSPCCVLDPKCKWHEKCNVVDGAICYK
zly75  DCFELWGLSKQVSRWSEWSDGAVKERTDGFEDDSDSEERCVFISTGNWAVNCHATQCAICYN

hly75  PTKKKLKSLIYSSRCFAAKNCSRWYKYGHCYKSS--DQALHSFSEAKKCSKHDSATIVSIKDEE
mly75  PTKKKLKSLIYSSRCFAAKNCSRWYKYGHCYKSS--DQALHSFSEAKKCSKHDSATIVSIKDEE
zly75  HLNSTSP--FKSSSSCFKSSGCSWYDEKCYNFNTYNSFEMMDAKNVQCLLSSNLTIRSKPE

hly75  NKFYSLRMRENNTMRVWLGLSOHSVDQSWWLDGSEVTFVKWEN----KSGCFCGCSLIASNET
mly75  NKFYSLRMRENNTMRVWLGLSOHSVDQSWWLDGSEVTFVKWEN----KSGCFCGCSLIASNET
zly75  NFEVSDYLNKPSITRVWIALVDAKQPTGQDQSEIDSSWELSNKAQHSIDGTQLCAVMSISGGS

hly75  WKVKECGLCFGRVVCVFLDCEPSTWVQFQDSCYIFLQEAIKVESIEDVRNQCETHRADMISIHNEEENA
mly75  WKVKECGLCFGRVVCVFLDCEPSTWVQFQDSCYIFLQEAIKVESIEDVRNQCETHRADMISIHNEEENA
zly75  WQASCSNSRSVVCVCHLAEVQF

hly75  FILDTLKKQKCPDDILLGMFYDTDASFKWFDNSNMTFDKWTQDDDELDVDTCAFLHIKTGEWKKGNC
mly75  -----
zly75  -----

hly75  EVSSVEGLTCKTAIPYKRKYLSDNHILSALVIASTVILVIGALWFLYKHSDSRFTVFTAPQSPY
mly75  -----
zly75  -----

hly75  NEDCVLVGGEINEYFVQFD
mly75  NEDCVLVGGEINEYFVQFD
zly75  AASSTSMNDAL-----

```

**Supplemental Figure 4: Regular molecular chamber definition in *adora2a*-morphants.** Molecular chamber definition is not impaired in *adora2a*-morphants compared to the control-injected zebrafish as demonstrated by regular *amhc* and *vmhc* expression.

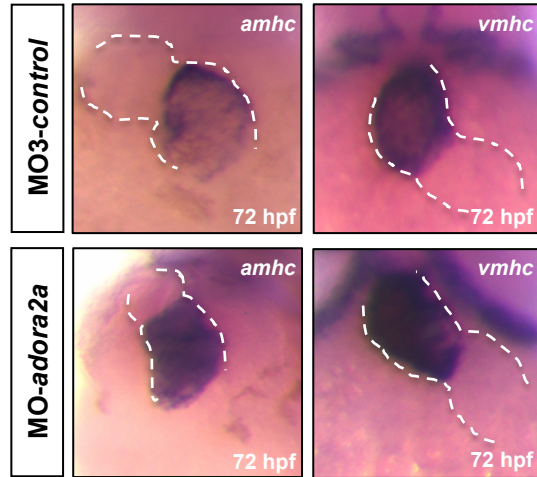

Supplement: emmm0005-0413-SD4.pdf [file emmm0005-0413-SD4.pdf]
